# Supplementary material for: Ultralow diffusion barrier induced by intercalation in layered N-based cathode materials for sodium-ion batteries
Source: Royal Society of Chemistry journal article supplement (doi:10.1039/d3ra00434a), 2023-01-01
Supplement: d3ra00434a1.pdf [file d3ra00434a1.pdf]

**Electronic supplementary information (ESI)**

**Ultralow diffusion barrier induced by intercalation in layered N-  
based cathode materials for Sodium-ion batteries**

Yundan Jiang, Wangping Xu, Wei Zhao\*, Juexian Cao\*

*Department of Physics & Hunan Institute of Advanced Sensing and Information  
Technology, Xiangtan University, Xiangtan 411105, PR China*

\*Corresponding authors: zhaowei@xtu.edu.cn; jxcao@xtu.edu.cn

## Details of setting the magnetic order and the U value

Since the 3d transition metal Cr is magnetic, spin polarization is taken into account in all calculations. In order to obtain the magnetic ground state of the system, a series of ferromagnetic and antiferromagnetic states are calculated. The antiferromagnetic states include Neel type, Stripe type, and Zigzag type, as shown in Fig. S1.<sup>1</sup> The results show that the antiferromagnetic state with Neel type is the ground state of the system.

PBE+U can accurately describe the energy correction induced by strongly correlated d electrons in transition metal systems. Based on the linear correspondence method<sup>2</sup>, the value of U is determined according to formula (S1):

$$U = x^{-1} - x_0^{-1} \approx \left( \frac{\partial N_I^{SCF}}{\partial \varphi_I} \right)^{-1} - \left( \frac{\partial N_I^{NSCF}}{\partial \varphi_I} \right)^{-1} \quad (S1)$$

Where  $N^{SCF}$  and  $N^{NSCF}$  are the numbers of d electrons under the self-consistent field and non-self-consistent field respectively.  $\varphi$  is the additional potential. (Here  $x=1.35$ ,  $x_0=0.23$ , as shown in Fig. S2).

Note: Ref. 2 was cited in the main article as Ref. 31.

- 1 X.-J. Dong, J.-Y. You, B. Gu and G. Su, *Phys. Rev. Appl.*, 2019, **12**, 014020.
- 2 M. Cococcioni and S. de Gironcoli, *Phys. Rev. B*, 2005, **71**, 035105.

## Supplementary Figures

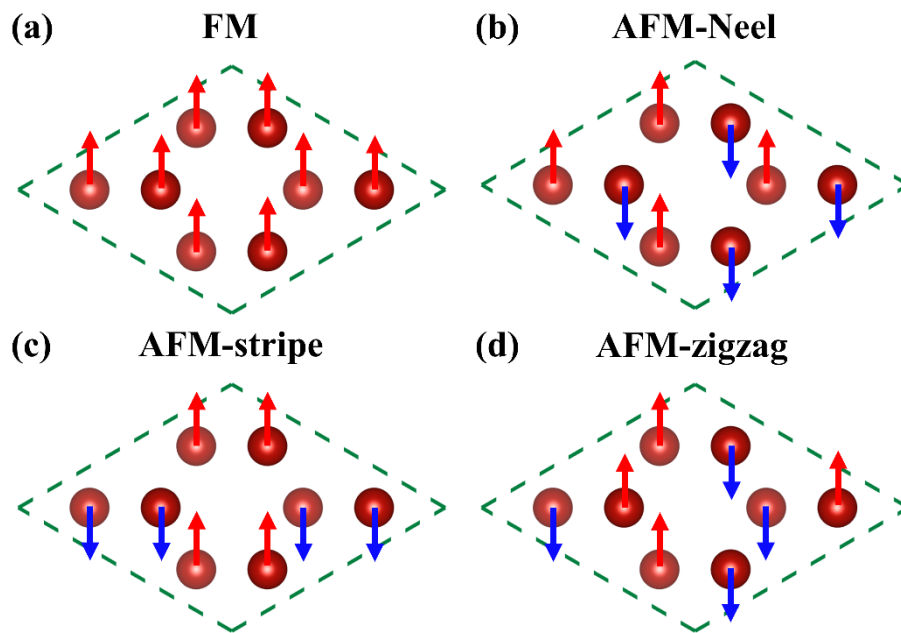

**Fig. S1** The four magnetic orders of the calculated system. (The dark red ball represents Cr, and the red and blue arrows represent spin up and spin down respectively)

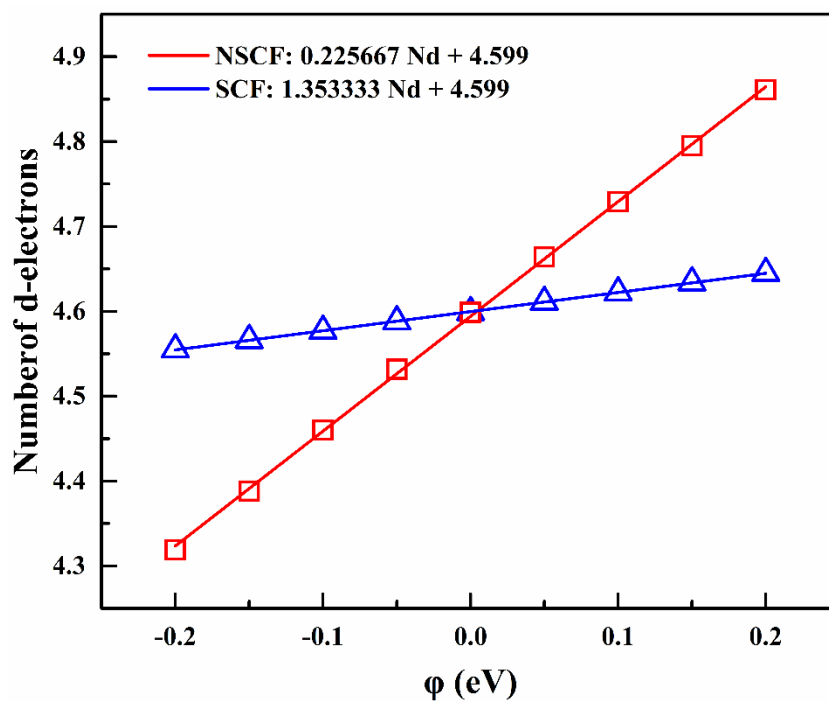

**Fig. S2** A linear fit of the number of d-electrons on Cr as a function of the additional potential  $\phi$ .

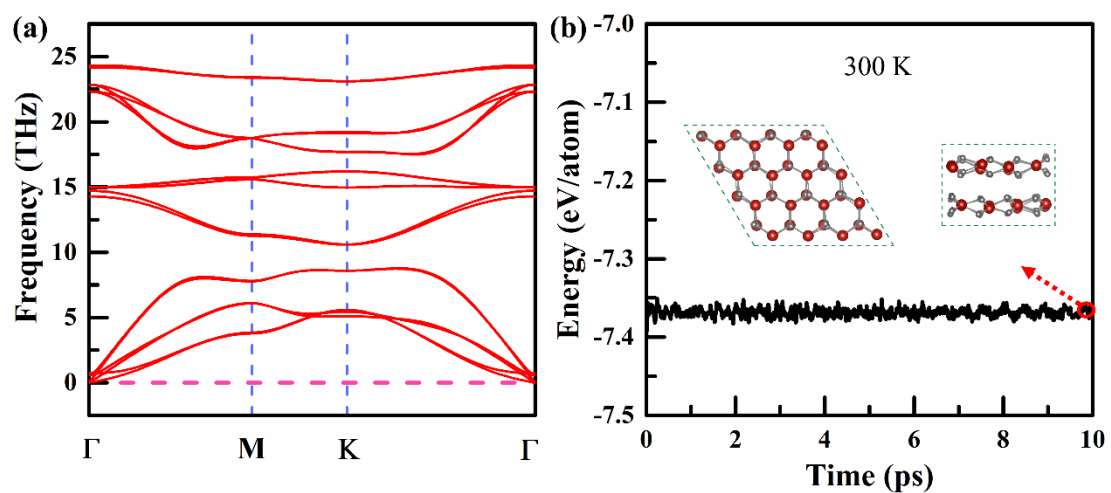

**Fig. S3** (a) Phonon spectrum of 2H-phase CrN<sub>2</sub>. (b) The total energy per atom fluctuations of 2H-phase CrN<sub>2</sub> in AIMD calculations using a canonical ensemble (NVT) at a temperature of 300 K. Inserts show the averaged structures in the last 100 fs times in AIMD calculations.

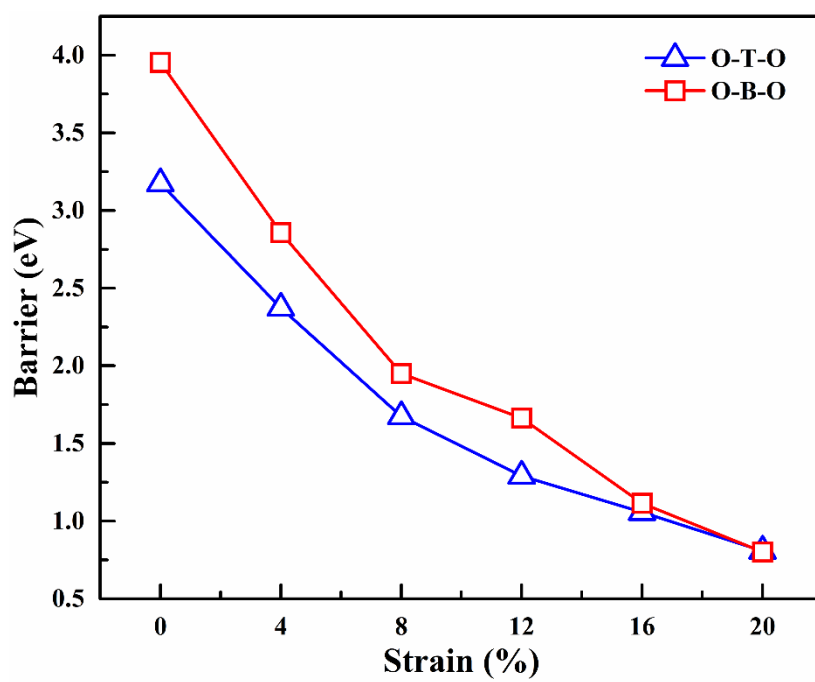

**Fig. S4** The relationship between the potential barrier and c-axis strain.

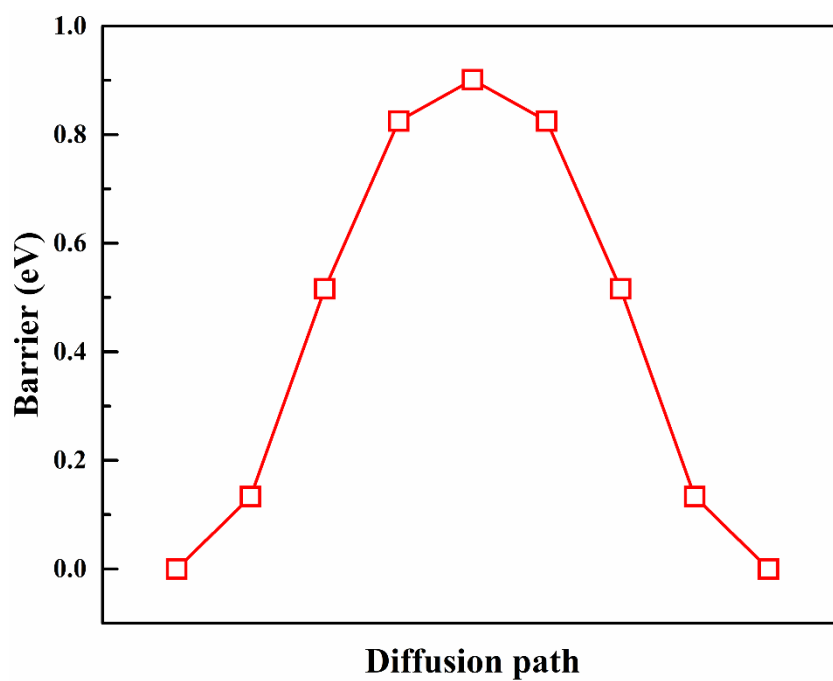

**Fig. S5** The energy profile of sodium ions along the diffusion path in the CrN<sub>2</sub> without intercalation.

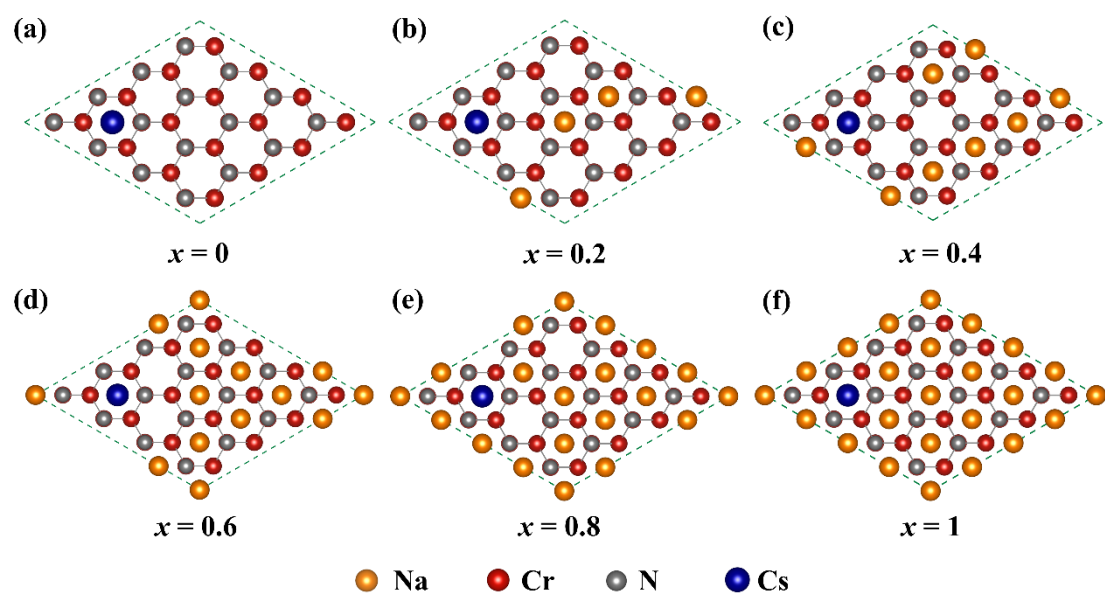

**Fig. S6** The most stable configuration of  $\text{Na}_x\text{Cs}_{1/16}\text{CrN}_2$  ( $x = 0 \sim 1$ ) under different sodium concentrations. (Orange, dark blue, dark red, and gray spheres represent Na, Cs, Cr, and N atoms, respectively.).



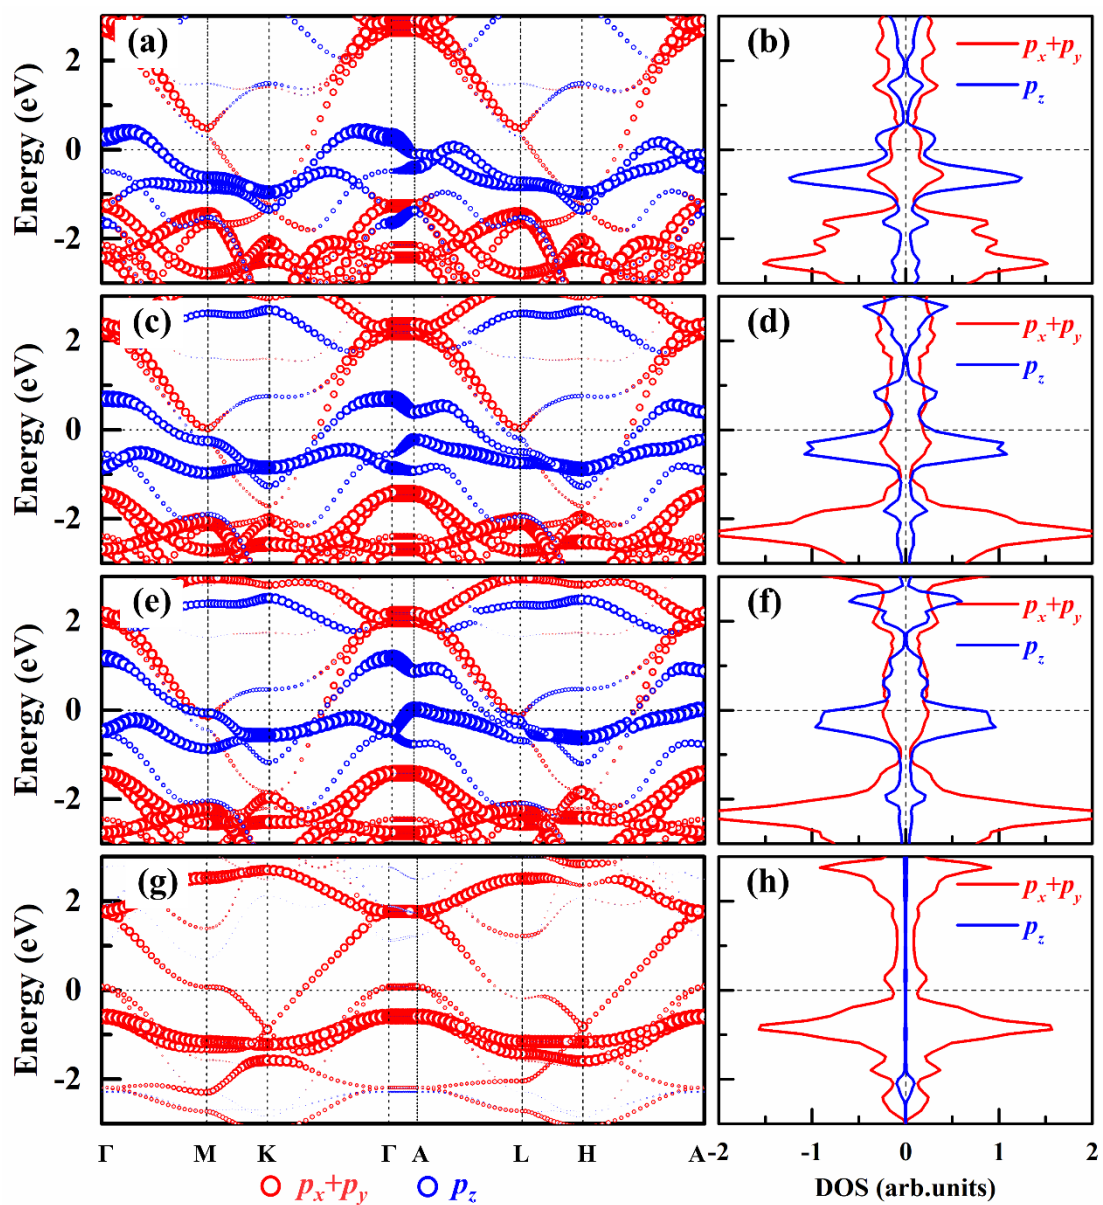

**Fig. S7** Calculated projected band (PBAND) and projected density of states (PDOS) for N in NaCrN<sub>2</sub> (a and b), KCrN<sub>2</sub> (c and d), RbCrN<sub>2</sub> (e and f) and CsCrN<sub>2</sub> (g and h), respectively.
